# Supplementary material for: Evolutionary patchwork of an insecticidal toxin shared between plant-associated pseudomonads and the insect pathogens Photorhabdus and Xenorhabdus
Source: PubMed Central journal article supplement (PMC4542124; doi:10.1186/s12864-015-1763-2), 2015-08-16
Supplement: 12864_2015_1763_MOESM1_ESM.pdf [file 12864_2015_1763_MOESM1_ESM.pdf]

**Table S1 Bacterial strains used in this study.**

| Strain                          | Origin <sup>a</sup>                  | Fit /Mcf | Reference      |
|---------------------------------|--------------------------------------|----------|----------------|
| <i>Azospirillum brasilense</i>  |                                      |          |                |
| UAP 154                         | Maize                                | -        | [60]           |
| CNF 535                         | Unknown                              | -        | [61]           |
| <i>Azospirillum lipoferum</i>   |                                      |          |                |
| Crt1                            | Maize                                | -        | [62]           |
| <i>Bacillus mycoides</i>        |                                      |          |                |
| A23                             | Unknown                              | -        | [63]           |
| <i>Burkholderia</i> spp.        |                                      |          |                |
| J2502                           | Unknown                              | -        | [63]           |
| <i>Cupriavidus necator</i>      |                                      |          |                |
| JMP134                          | Unknown                              | -        | [64]           |
| <i>Erwinia amylovora</i>        |                                      |          |                |
| CFBP 1430                       | Hawthorn                             | -        | [65]           |
| <i>Erwinia carotovora</i>       |                                      |          |                |
| ATTn10                          | Unknown                              | -        | [66]           |
| EC852                           | Unknown                              | -        | [67]           |
| <i>Escherichia coli</i>         |                                      |          |                |
| K12                             | Laboratory strain                    | -        | [68]           |
| <i>Photorhabdus asymbiotica</i> |                                      |          |                |
| ATCC 43949                      | Human                                | +        | [20]           |
| <i>Photorhabdus luminescens</i> |                                      |          |                |
| 2                               | <i>Heterorhabditis</i> (Swiss soil)  | +        | This study     |
| 3                               | <i>Heterorhabditis</i> (Swiss soil)  | +        | This study     |
| I                               | <i>Heterorhabditis</i> (Swiss soil)  | +        | This study     |
| TT01                            | <i>Heterorhabditis bacteriophora</i> | +        | [69]           |
| <i>Photorhabdus temperata</i>   |                                      |          |                |
| 1                               | <i>Heterorhabditis</i> (Swiss soil)  | +        | This study     |
| 7                               | <i>Heterorhabditis</i> (Swiss soil)  | +        | This study     |
| 9                               | <i>Heterorhabditis</i> (Swiss soil)  | +        | This study     |
| 10                              | <i>Heterorhabditis</i> (Swiss soil)  | +        | This study     |
| 17                              | <i>Heterorhabditis</i> (Swiss soil)  | +        | This study     |
| <i>Pseudomonas aeruginosa</i>   |                                      |          |                |
| PAO1                            | Human                                | -        | [70]           |
| <i>Pseudomonas caricapapaye</i> |                                      |          |                |
| LMG2152                         |                                      | -        | LMG collection |
| <i>Pseudomonas chlororaphis</i> |                                      |          |                |
| 30-84                           | Soil                                 | +        | [71]           |
| DTR 133                         | Soil                                 | +        | [72]           |
| GP72                            | Green pepper                         | +        | [27]           |
| LMG 5004                        | Contaminated plate                   | +        | [63]           |
| LMG 1245                        | River Clay                           | +        | [63]           |
| CD                              | Cyclops (water)                      | +        | This study     |
| PCL 1391                        | Tomato                               | +        | [73]           |
| <i>Pseudomonas corrugata</i>    |                                      |          |                |
| LMG2172                         | Tomato                               | -        | [74]           |
| <i>Pseudomonas fluorescens</i>  |                                      |          |                |
| 2-79                            | Wheat                                | -        | [75]           |
| C*1A1                           | Cucumber                             | -        | [25]           |
| C6-11                           | Tobacco                              | -        | [39]           |
| C6-16                           | Tobacco                              | -        | [39]           |
| C10-180                         | Tobacco                              | -        | This study     |
| C10-181                         | Tobacco                              | -        | [39]           |
| C10-186                         | Tobacco                              | -        | [40]           |
| C10-190                         | Tobacco                              | -        | [40]           |
| C10-197                         | Tobacco                              | -        | [39]           |
| C10-204                         | Tobacco                              | -        | [39]           |
| C10-205                         | Tobacco                              | -        | [39]           |

|         |                  |   |                |
|---------|------------------|---|----------------|
| CM1'A2  | Cucumber         | - | [76]           |
| F113    | Sugar beet       | - | [77]           |
| K92-1   | Cucumber         | - | This study     |
| K92-5   | Tomato           | - | This study     |
| K92-6   | Tomato           | - | This study     |
| K92-8   | Tomato           | - | This study     |
| K92-9   | Tomato           | - | This study     |
| K92-11  | Cucumber         | - | This study     |
| K92-12  | Cucumber         | - | This study     |
| K92-14  | Cucumber         | - | [41]           |
| K92-48  | Cotton           | - | [41]           |
| K92-53  | Cotton           | - | [41]           |
| K92-59  | Cucumber         | - | [41]           |
| K93-2   | Tobacco          | - | [41]           |
| K93-3   | Tobacco          | - | [41]           |
| K93-7   | Cucumber         | - | [41]           |
| K93-8   | Cucumber         | - | [41]           |
| K93-9   | Cucumber         | - | [41]           |
| K93-39  | Wheat            | - | [41]           |
| K93-43  | Wheat            | - | This study     |
| K93-48  | Wheat            | - | [78]           |
| K93-52  | Tomato           | - | [41]           |
| K93-53  | Tomato           | - | [78]           |
| K94-18  | Tomato           | - | [41]           |
| K94-31  | Cucumber         | - | [41]           |
| K94-37  | Cucumber         | - | [41]           |
| K95-7   | Cucumber         | - | [78]           |
| KD      | Wheat            | - | [78]           |
| LMG1794 | Water            | - | LMG collection |
| P1.8    | Earthworm        | - | This study     |
| P1.31   | Woodlouse (dead) | - | This study     |
| P3      | Barley           | - | [79]           |
| P12     | Tobacco          | - | [25]           |
| P96.25  | Wheat            | - | [41]           |
| P97.26  | Tomato           | - | [41]           |
| P97.39  | Cucumber         | - | [41]           |
| P97-1   | Cucumber         | - | [41]           |
| P97-2   | Cucumber         | - | [41]           |
| P97-6   | Tomato           | - | [41]           |
| P97-20  | Wheat            | - | [41]           |
| P97-26  | Tomato           | - | [41]           |
| P97-27  | Cucumber         | - | [41]           |
| P97-30  | Wheat            | - | [41]           |
| PF36    | Unknown          | - | [63]           |
| Pf-153  | Tobacco          | - | [80]           |
| Q1-87   | Wheat            | - | [25]           |
| Q2-87   | Wheat            | - | [81]           |
| Q7-87   | Wheat            | - | [25]           |
| Q12-87  | Wheat            | - | [25]           |
| Q13-87  | Wheat            | - | [25]           |
| Q37-87  | Wheat            | - | [25]           |
| Q128-87 | Wheat            | - | [82]           |
| S7-29   | Tobacco          | - | [39]           |
| S7-46   | Tobacco          | - | [39]           |
| S7-52   | Tobacco          | - | [39]           |
| S7-42   | Tobacco          | - | [39]           |
| S8-110  | Tobacco          | - | [39]           |
| S8-130  | Tobacco          | - | [39]           |
| S8-151  | Tobacco          | - | [40]           |
| TM1A3   | Tomato           | - | [25]           |

|                                           |                   |   |                |
|-------------------------------------------|-------------------|---|----------------|
| TM1A4                                     | Tomato            | - | [83]           |
| TM1B2                                     | Tomato            | - | [76]           |
| 53K-B2                                    | Unknown           | - | This study     |
| <i>Pseudomonas kilonensis</i>             |                   |   |                |
| 520-20                                    | Soil              | - | [84]           |
| <i>Pseudomonas plecoglossicida</i>        |                   |   |                |
| PFCP1                                     | Soil              | - | [78]           |
| <i>Pseudomonas protegens</i> <sup>b</sup> |                   |   |                |
| C6.2                                      | Tobacco           | + | [78]           |
| C6-23                                     | Tobacco           | + | [78]           |
| CHA0                                      | Tobacco           | + | [85]           |
| K94-4                                     | Tomato            | + | [41]           |
| K94-5                                     | Tomato            | + | [41]           |
| K94-6                                     | Cucumber          | + | [25]           |
| K94-30                                    | Cucumber          | + | [41]           |
| K94-40                                    | Cucumber          | + | [41]           |
| K94-41                                    | Cucumber          | + | [41]           |
| M                                         | Sunflower         | + | This study     |
| PF                                        | Wheat             | + | [86]           |
| BRIP                                      | Cyclops (water)   | + | This study     |
| Pf1                                       | Tobacco           | + | [25]           |
| Pf-5                                      | Cotton            | + | [87]           |
| Pf-68                                     | Sunflower         | + | [88]           |
| Pf-100                                    | Sunflower         | + | [88]           |
| PGNL1                                     | Tobacco           | + | [25]           |
| PGNR1                                     | Tobacco           | + | [25]           |
| PGNR2                                     | Tobacco           | + | [25]           |
| S8-62                                     | Tobacco           | + | [78]           |
| P6-1                                      | Unknown           | + | This study     |
| <i>Pseudomonas putida</i>                 |                   |   |                |
| 8176 NCBI                                 | Milk              | - | [89]           |
| KB1                                       | Soil              | - | [90]           |
| KT2440                                    | Soil              | - | [91]           |
| LMG2257                                   | Soil              | - | [64]           |
| <i>Pseudomonas rhizosphaerae</i>          |                   |   |                |
| IH5                                       | Rhizosphere grass | - | [92]           |
| <i>Pseudomonas</i> sp.                    |                   |   |                |
| A506                                      | Pear leaves       | - | [93]           |
| B13                                       | Sewage            | - | [94]           |
| CMR12a                                    | Cocoyam           | + | [29]           |
| DSS73                                     | Soil              | - | [95]           |
| Jan                                       | Apple blossom     | - | [96]           |
| <i>Pseudomonas syringae</i>               |                   |   |                |
| ATCC 19310                                | Lilac             | - | [97]           |
| LMG 1247                                  | Lilac             | - | LMG collection |
| <i>Rhodococcus</i> sp.                    |                   |   |                |
| C125                                      | River sediment    | - | [98]           |
| <i>Sphingomonas herbicidovorans</i>       |                   |   |                |
| MH                                        | Soil              | - | [99]           |
| <i>Sphingomonas paucimobilis</i>          |                   |   |                |
| UT26                                      | Soil              | - | [100]          |
| <i>Staphylococcus aureus</i>              |                   |   |                |
| COL                                       | Hospital          | - | [101]          |
| MW2                                       | Human             | - | [102]          |
| RN4220                                    | Laboratory strain | - | [103]          |
| <i>Staphylococcus epidermidis</i>         |                   |   |                |
| RP62A                                     | Hospital          | - | [104]          |
| <i>Streptomyces turgidiscabies</i>        |                   |   |                |
| Sy9103                                    | Scab lesions      | - | [105]          |
| <i>Xanthomonas campestris</i>             |                   |   |                |

|                                |                                 |   |            |
|--------------------------------|---------------------------------|---|------------|
| ATCC33913                      | Plant                           | - | [78]       |
| <i>Xenorhabdus bovienii</i>    |                                 |   |            |
| 13                             | <i>Steinernema</i> (Swiss soil) | + | This study |
| 14                             | <i>Steinernema</i> (Swiss soil) | + | This study |
| 25                             | <i>Steinernema</i> (Swiss soil) | + | This study |
| 26                             | <i>Steinernema</i> (Swiss soil) | + | This study |
| 27                             | <i>Steinernema</i> (Swiss soil) | + | This study |
| 28                             | <i>Steinernema</i> (Swiss soil) | + | This study |
| 29                             | <i>Steinernema</i> (Swiss soil) | + | This study |
| 30                             | <i>Steinernema</i> (Swiss soil) | + | This study |
| 31                             | <i>Steinernema</i> (Swiss soil) | + | This study |
| 33                             | <i>Steinernema</i> (Swiss soil) | + | This study |
| 35                             | <i>Steinernema</i> (Swiss soil) | + | This study |
| 36                             | <i>Steinernema</i> (Swiss soil) | + | This study |
| 37                             | <i>Steinernema</i> (Swiss soil) | + | This study |
| 39                             | <i>Steinernema</i> (Swiss soil) | + | This study |
| 44                             | <i>Steinernema</i> (Swiss soil) | + | This study |
| 61                             | <i>Steinernema</i> (Swiss soil) | + | This study |
| 64                             | <i>Steinernema</i> (Swiss soil) | + | This study |
| C                              | <i>Steinernema</i> (Swiss soil) | + | This study |
| D                              | <i>Steinernema</i> (Swiss soil) | + | This study |
| F                              | <i>Steinernema</i> (Swiss soil) | + | This study |
| J                              | <i>Steinernema</i> (Swiss soil) | + | This study |
| SS-2004                        | <i>Steinernema</i> (Swiss soil) | + | [106]      |
| <i>Xenorhabdus nematophila</i> |                                 |   |            |
| ATCC 19061                     | <i>Steinernema carpocapsae</i>  | + | [106]      |

<sup>a</sup> If a plant is indicated, the respective strain has been isolated from its roots or rhizosphere

<sup>b</sup> *P. protegens* was recently proposed as an own species [26] and has been designated as *P. fluorescens* in previous publications
