# Supplementary material for: Evolutionary patchwork of an insecticidal toxin shared between plant-associated pseudomonads and the insect pathogens Photorhabdus and Xenorhabdus
Source: PubMed Central journal article supplement (PMC4542124; doi:10.1186/s12864-015-1763-2), 2015-08-16
Supplement: 12864_2015_1763_MOESM2_ESM.pdf [file 12864_2015_1763_MOESM2_ESM.pdf]

**Table S2 BLASTp analysis of *P. protegens* CHA0 Fit components against completed bacterial whole genome sequences.**

| Query          | BLAST hit <sup>a</sup> | Product                                   | Species                                                              | % aa identity (similarity) | Coverage | e-value |
|----------------|------------------------|-------------------------------------------|----------------------------------------------------------------------|----------------------------|----------|---------|
| FitA           | NP_930357.1            | plu3125                                   | <i>Photothabdus luminescens</i> subsp. <i>laumondii</i> TTO1         | 69 (82)                    | 98       | 0.0     |
|                | YP_001448573.1         | RTX toxin transporter                     | <i>Vibrio harveyi</i> ATCC BAA-1116                                  | 59 (76)                    | 97       | 0.0     |
|                | YP_003041907.1         | RTX toxin ABC transporter                 | <i>Photothabdus asymbiotica</i> subsp. <i>asymbiotica</i> ATCC 43949 | 59 (76)                    | 88       | 0.0     |
|                | NP_928643.1            | RTX toxin ABC transporter                 | <i>Photothabdus luminescens</i> subsp. <i>laumondii</i> TTO1         | 58 (76)                    | 88       | 0.0     |
| FitB           | NP_762443.2            | RTX toxin transporter                     | <i>Vibrio vulnificus</i> CMCP6                                       | 58 (76)                    | 88       | 0.0     |
|                | NP_930358.1            | plu3126                                   | <i>Photothabdus luminescens</i> subsp. <i>laumondii</i> TTO1         | 65 (83)                    | 97       | 0.0     |
|                | YP_001448572.1         | VIBHAR_06454                              | <i>Vibrio harveyi</i> ATCC BAA-1116                                  | 52 (71)                    | 94       | 3e-150  |
|                | YP_002923190.1         | ABC transporter                           | Candidatus <i>Hamiltonella defensa</i> 5AT                           | 50 (71)                    | 94       | 2e-137  |
|                | YP_070687.1            | RTX toxin ABC transporter                 | <i>Yersinia pseudotuberculosis</i> IP 32953                          | 49 (67)                    | 98       | 6e-113  |
| FitC           | YP_004298409.1         | hemolysin transport protein               | <i>Yersinia enterocolitica</i> subsp. <i>palaearctica</i> 105.5R     | 47 (66)                    | 98       | 4e-109  |
|                | NP_930359.1            | plu3127                                   | <i>Photothabdus luminescens</i> subsp. <i>laumondii</i> TTO1         | 73 (84)                    | 98       | 0.0     |
|                | ZP_01956307.1          | toxin secretion transporter               | <i>Vibrio cholerae</i> MZO-3                                         | 58 (74)                    | 97       | 0.0     |
|                | NP_762445.1            | RTX toxin transporter                     | <i>Vibrio vulnificus</i> CMCP6                                       | 59 (74)                    | 97       | 0.0     |
|                | NP_928641.1            | plu1331                                   | <i>Photothabdus luminescens</i> subsp. <i>laumondii</i> TTO1         | 57 (74)                    | 99       | 0.0     |
| FitD           | YP_004298408.1         | putative toxin transport protein          | <i>Yersinia enterocolitica</i> subsp. <i>palaearctica</i> 105.5R     | 58 (72)                    | 98       | 0.0     |
|                | NP_931332.1            | Mcf protein                               | <i>Photothabdus luminescens</i> subsp. <i>laumondii</i> TTO1         | 73 (83)                    | 100      | 0.0     |
|                | YP_003042199.1         | MCF toxin                                 | <i>Photothabdus asymbiotica</i> subsp. <i>asymbiotica</i> ATCC 43949 | 71 (81)                    | 97       | 0.0     |
|                | NP_930360.1            | plu3128                                   | <i>Photothabdus luminescens</i> subsp. <i>laumondii</i> TTO1         | 67 (81)                    | 69       | 0.0     |
|                | YP_003712268.1         | XNC1_2028                                 | <i>Xenorhabdus nematophila</i> ATCC 19061                            | 64 (78)                    | 69       | 0.0     |
| YP_003468304.1 | Mcf protein            | <i>Xenorhabdus bovienii</i> SS-2004       | 69 (79)                                                              | 74                         | 0.0      |         |
| YP_003712501.1 | XNC1_2265              | <i>Xenorhabdus nematophila</i> ATCC 19061 | 65 (76)                                                              | 63                         | 0.0      |         |

|      |                |                                                                                |                                                                       |         |    |        |
|------|----------------|--------------------------------------------------------------------------------|-----------------------------------------------------------------------|---------|----|--------|
|      | EGU44028.1     | Mcf2                                                                           | <i>Vibrio splendidus</i> ATCC 33789                                   | 29 (48) | 65 | 0.0    |
| FitE | ZP_10648180.1  | PSEBR_a511                                                                     | <i>Pseudomonas brassicacearum</i> subsp. <i>brassicacearum</i> NFM421 | 62 (79) | 89 | 4e-159 |
|      | YP_346224.1    | Type I secretion outer membrane protein, TolC                                  | <i>Pseudomonas fluorescens</i> Pf0-1                                  | 61 (78) | 90 | 7e-159 |
|      | YP_257681.1    | TolC family type I secretion outer membrane protein                            | <i>Pseudomonas protegens</i> Pf-5                                     | 61 (78) | 90 | 2e-156 |
|      | EGH31280.1     | Type I secretion outer membrane protein, TolC                                  | <i>Pseudomonas syringae</i> pv. <i>japonica</i> str. M301072          | 62 (79) | 90 | 5e-155 |
|      | ZP_07003042.1  | Type I secretion outer membrane protein, TolC precursor                        | <i>Pseudomonas savastanoi</i> pv. <i>savastanoi</i> NCPPB 3335        | 63 (79) | 88 | 1e-154 |
| FitF | YP_285112.1    | PAS/PAC sensor hybrid histidine kinase                                         | <i>Dechloromonas aromatica</i> RCB (beta)                             | 41 (57) | 48 | 1e-106 |
|      | YP_005041177.1 | Hybrid sensor histidine kinase                                                 | <i>Azospirillum lipoferum</i> 4B                                      | 38 (60) | 61 | 3e-100 |
|      | YP_865134.1    | multi-sensor hybrid histidine kinase                                           | <i>Magnetococcus marinus</i> MC-1                                     | 37 (58) | 49 | 4e-98  |
|      | YP_004514611.1 | PAS domain-containing protein                                                  | <i>Thiocystis violascens</i> DSM 198                                  | 40 (58) | 66 | 6e-98  |
|      | YP_005050479.1 | multi-sensor hybrid histidine kinase                                           | <i>Methylobionas methanica</i> MC09]                                  | 34 (54) | 67 | 9e-98  |
| FitG | YP_004499875.1 | LysR family transcriptional regulator                                          | <i>Serratia</i> sp. AS12                                              | 45 (65) | 98 | 3e-79  |
|      | YP_348645.1    | LysR family transcriptional regulator                                          | <i>Pseudomonas fluorescens</i> Pf0-1                                  | 45 (64) | 95 | 7e-79  |
|      | YP_260488.1    | LysR family transcriptional regulator                                          | <i>Pseudomonas protegens</i> Pf-5                                     | 46 (63) | 95 | 6e-76  |
|      | ZP_07775323.1  | LysR family transcriptional regulator                                          | <i>Pseudomonas fluorescens</i> WH6                                    | 45 (61) | 97 | 2e-73  |
|      | YP_001007048.1 | LysR family transcriptional regulator                                          | <i>Yersinia enterocolitica</i> subsp. <i>enterocolitica</i> 8081      | 42 (64) | 97 | 2e-73  |
| FitH | YP_005025997.1 | response regulator receiver modulated metal dependent phosphohydrolase         | <i>Vibrio</i> sp. EJY3 (gamma)                                        | 54 (76) | 36 | 0.0    |
|      | NP_441314.1    | regulatory components of sensory transduction system                           | <i>Synechocystis</i> sp. PCC 6803 (cyano)                             | 53 (74) | 36 | 9e-33  |
|      | YP_002954478.1 | response regulator receiver protein                                            | <i>Desulfovibrio magneticus</i> RS-1 (delta)                          | 47 (62) | 44 | 2e-32  |
|      | YP_006416106.1 | response regulator containing a CheY-like receiver domain and an HD-GYP domain | <i>Thiocystis violascens</i> DSM 198 (gamma)                          | 52 (72) | 35 | 1e-31  |
|      | YP_421203.1    | response regulator                                                             | <i>Magnetospirillum magneticum</i> AMB-1 (alpha)                      | 52 (68) | 39 | 5e-31  |

A total of 1234 completed genomic sequences were included in BLASTp searches. Highly identical sequences ( $\leq 2\%$  divergence) within the same species were omitted.
