# Supplementary material for: Evolutionary patchwork of an insecticidal toxin shared between plant-associated pseudomonads and the insect pathogens Photorhabdus and Xenorhabdus
Source: PubMed Central journal article supplement (PMC4542124; doi:10.1186/s12864-015-1763-2), 2015-08-16
Supplement: 12864_2015_1763_MOESM3_ESM.pdf [file 12864_2015_1763_MOESM3_ESM.pdf]

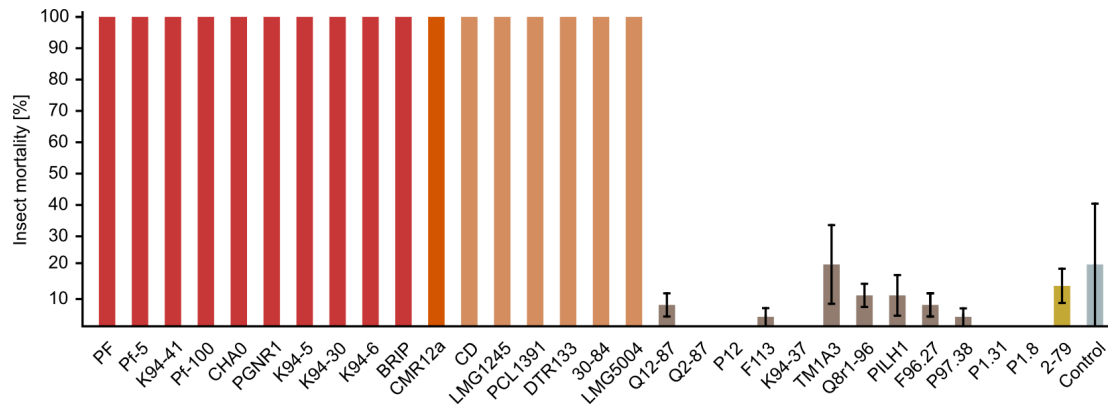

**Figure S1 Insecticidal activity correlates with presence of the *fitD* gene.** Insect mortality of *G. mellonella* larvae four days after injection of  $4 \times 10^4$  cells of 17 *Fit*<sup>+</sup> producing and 13 non-producing *Pseudomonas* strains. Each strain was tested on a total of 30 larvae (five replicate plates with six larvae per plate). Bars show average of insect mortality for each strain. Error bars show standard error of the mean. *Fit*<sup>+</sup> strains were significantly different from *Fit*<sup>-</sup> based on Wilcoxon rank sum test grouped by *Fit*<sup>+</sup> and *Fit*<sup>-</sup> strains ( $P < 0.05$ ).
